# Supplementary material for: Genomics and LC-MS Reveal Diverse Active Secondary Metabolites in Bacillus amyloliquefaciens WS-8
Source: PubMed Central journal article supplement (PMC9728402; doi:10.4014/jmb.1906.06055), 2019-10-10
Supplement: JMB-30-3-417-supple.pdf [file JMB-30-3-417-supple.pdf]

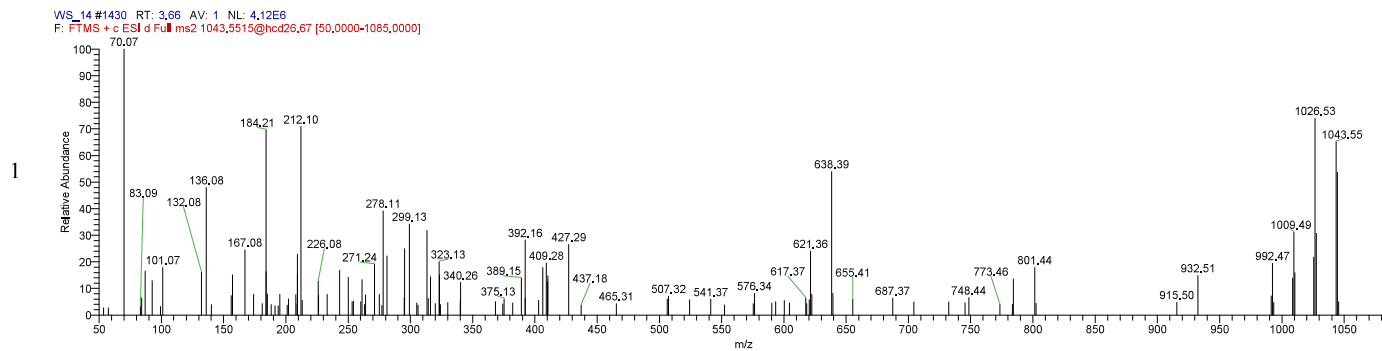

Figure S1 MS/MS spectra of compounds 1

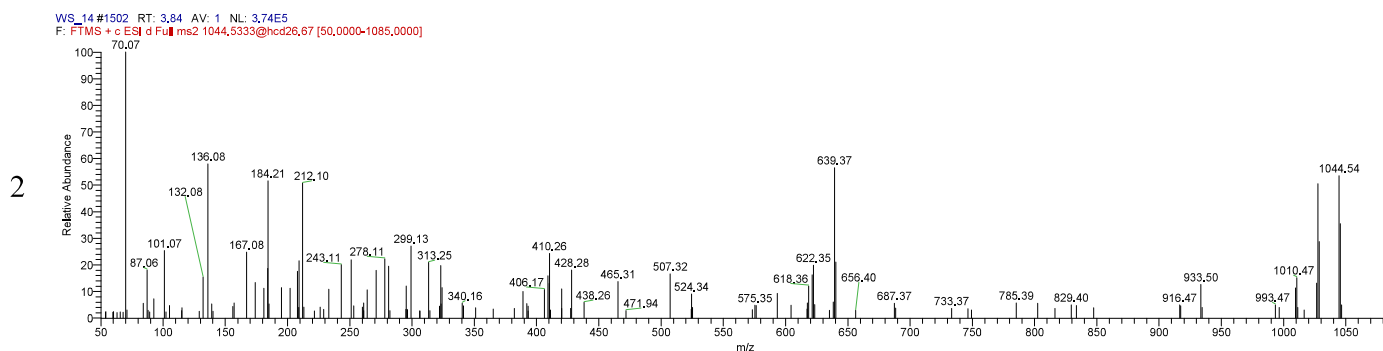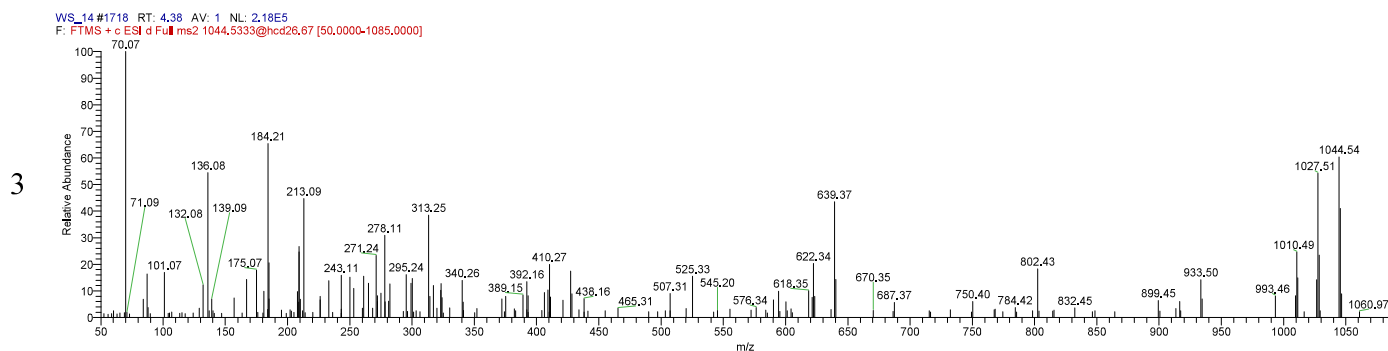

Figure S2 MS/MS spectra of compounds 2 and 3

4

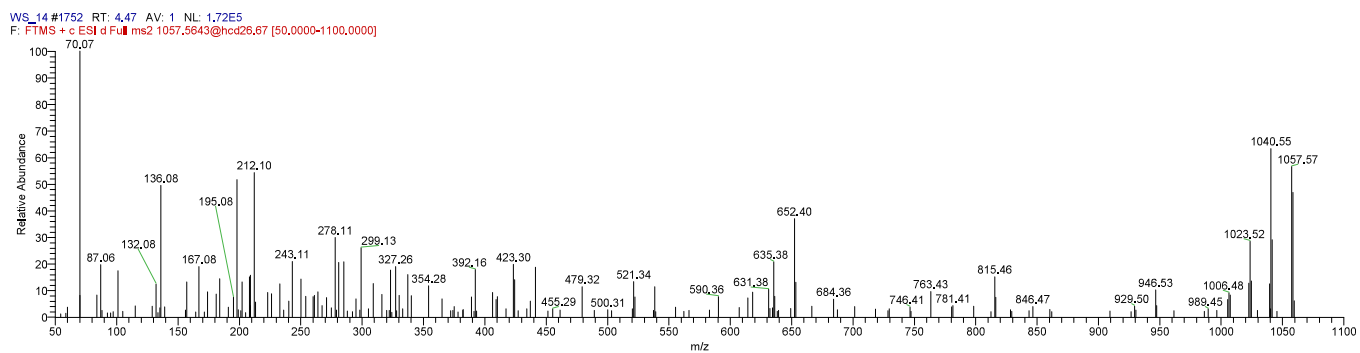

5

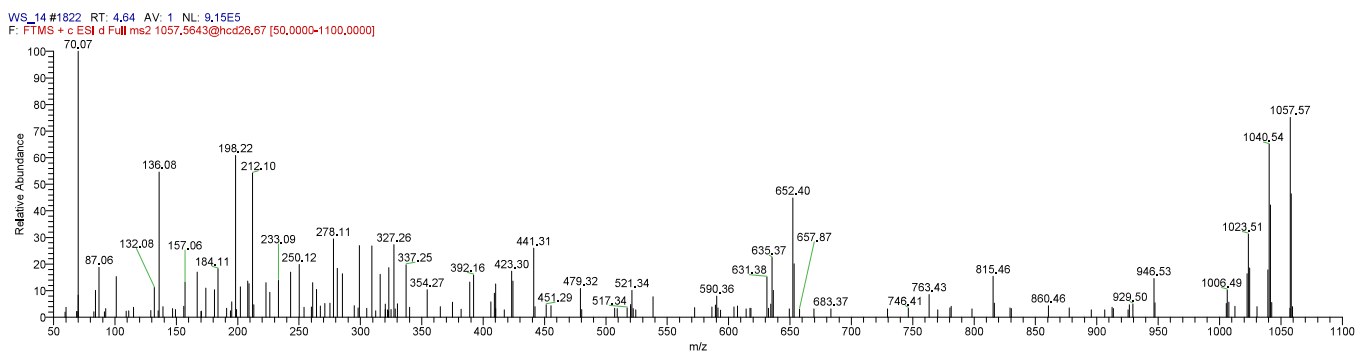

Figure S3 MS/MS spectra of compounds 4 and 5

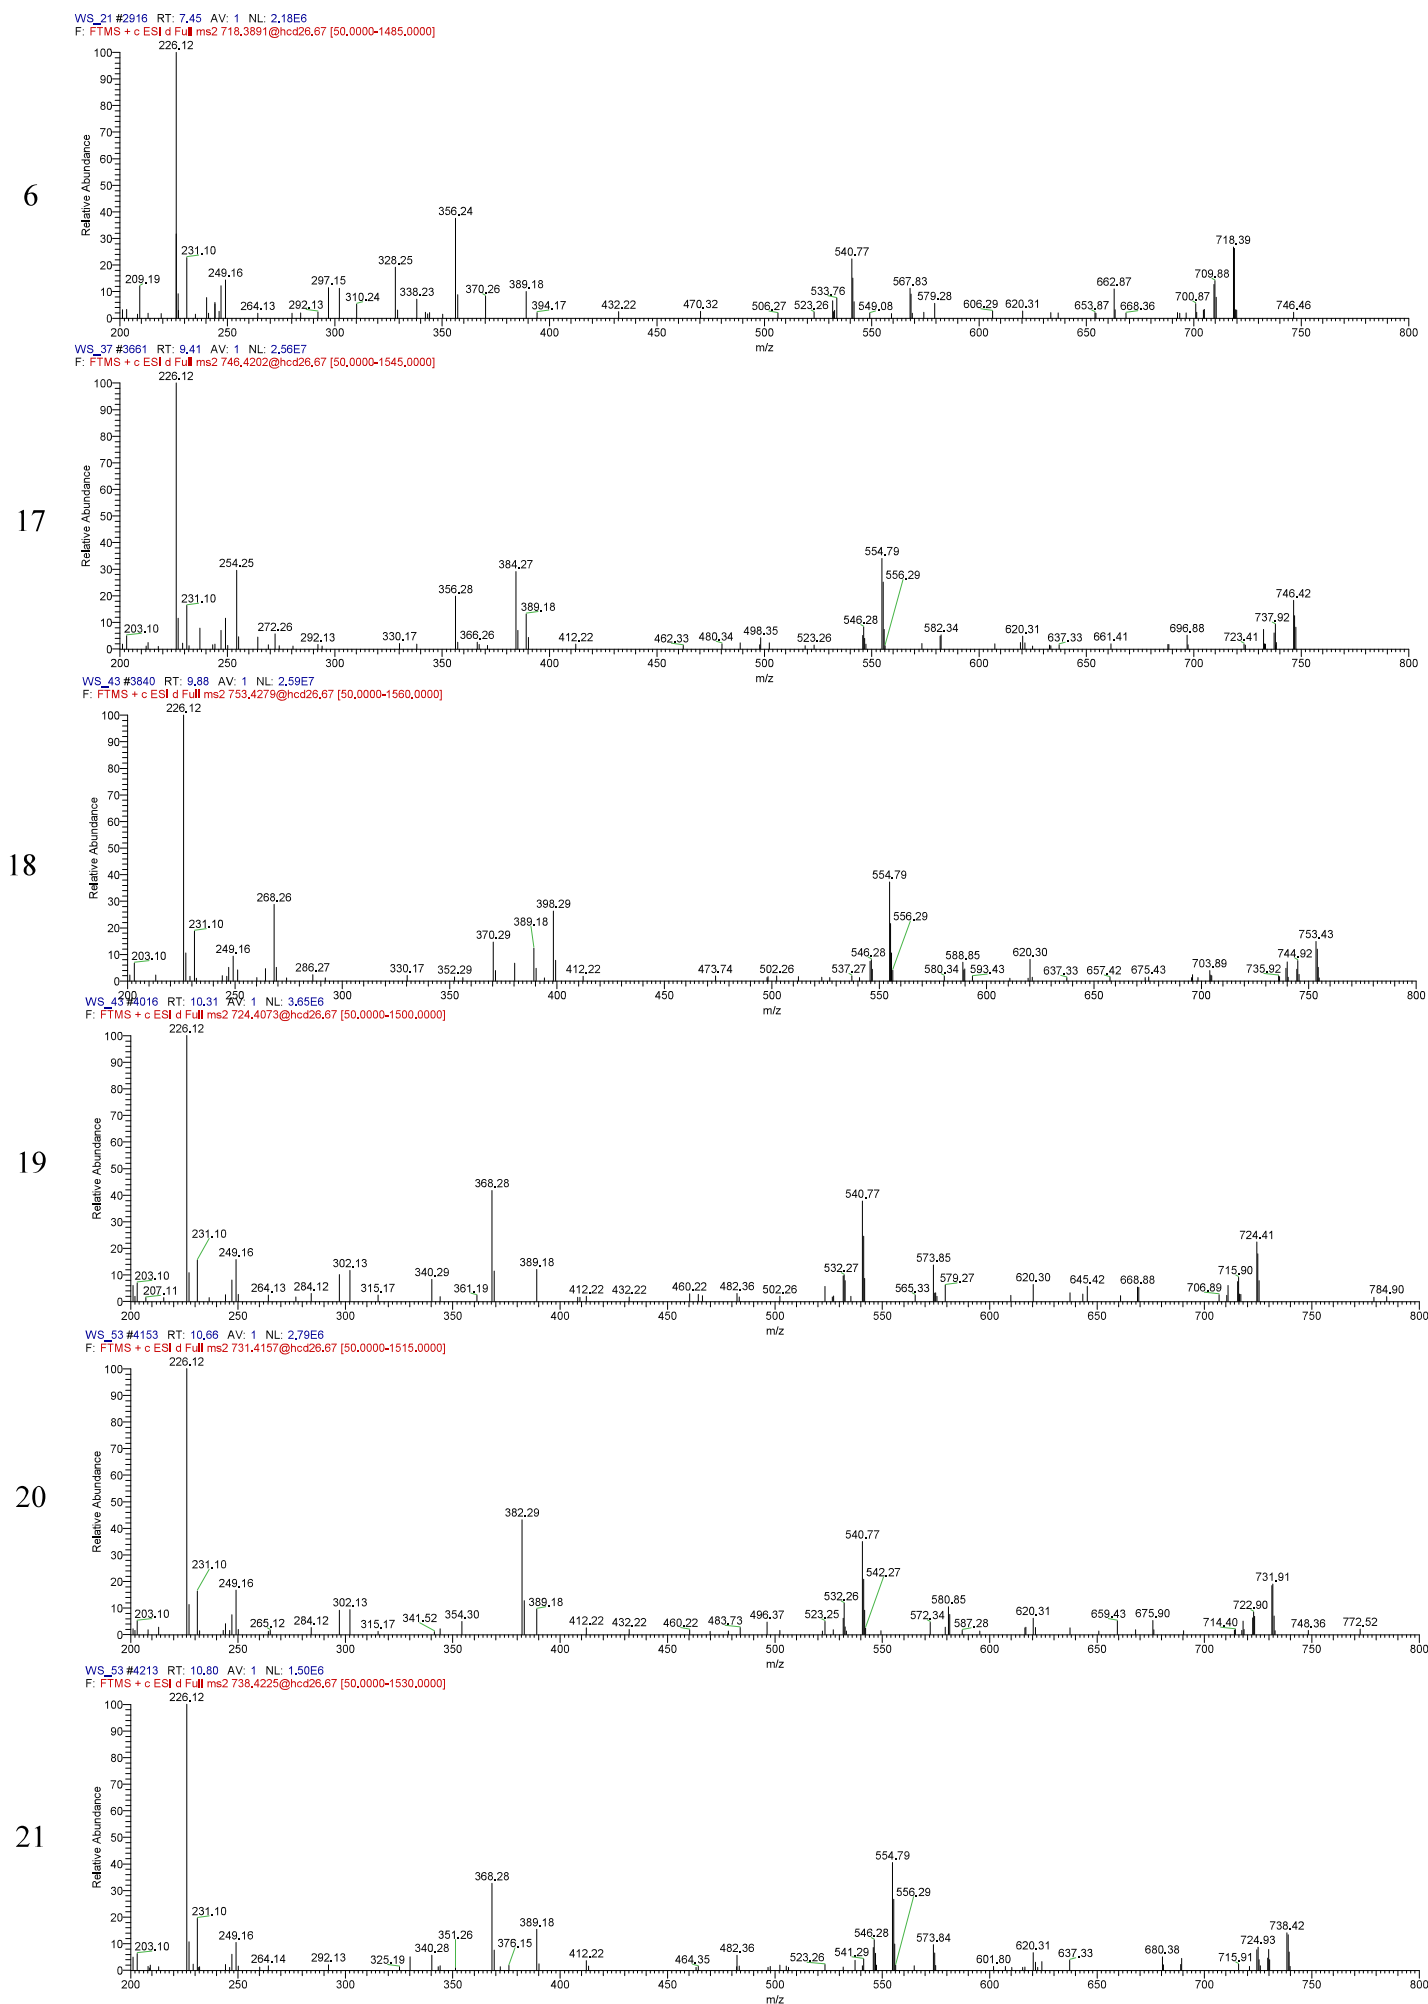

Figure S4 MS/MS spectra of compounds 6, 17, 18, 19, 20 and 21

7

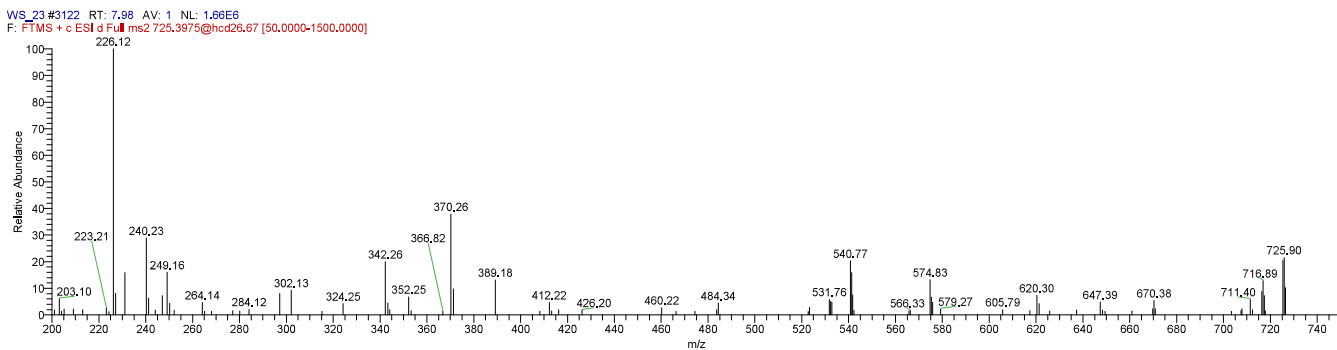

9

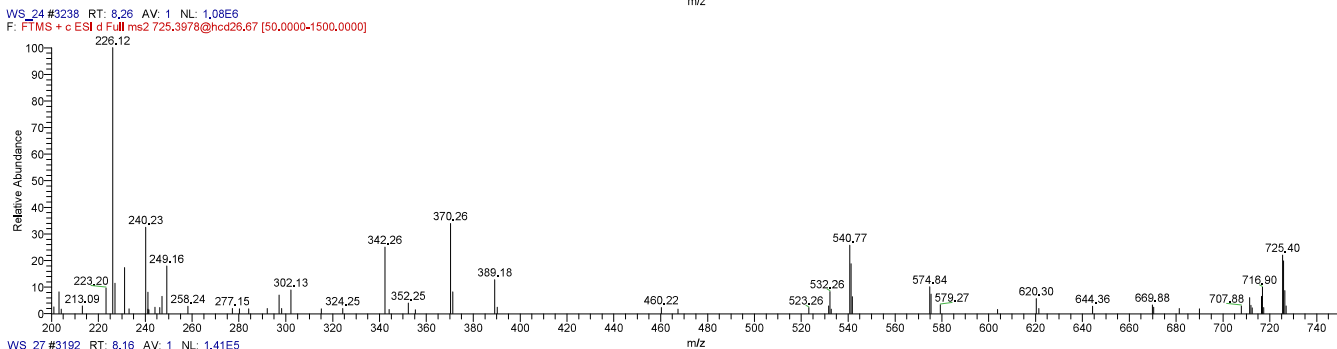

10

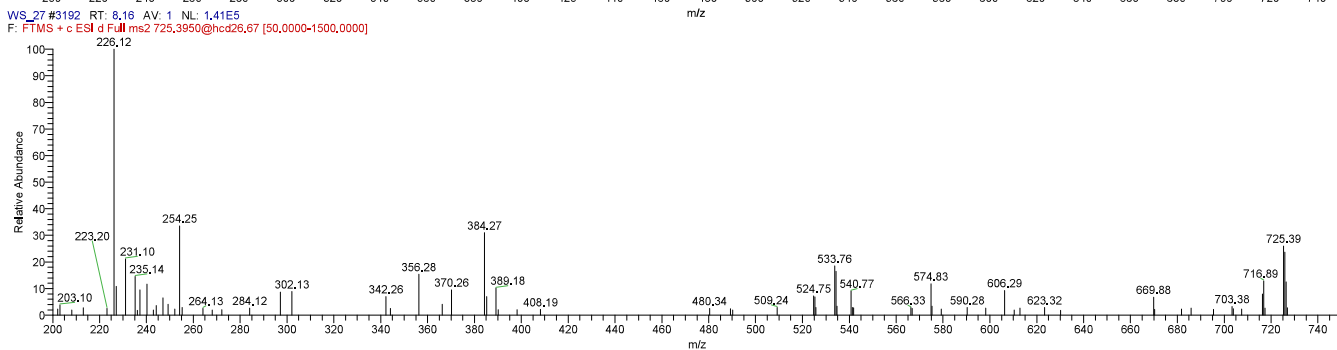

Figure S5 MS/MS spectra of compounds 7, 9 and 10

8

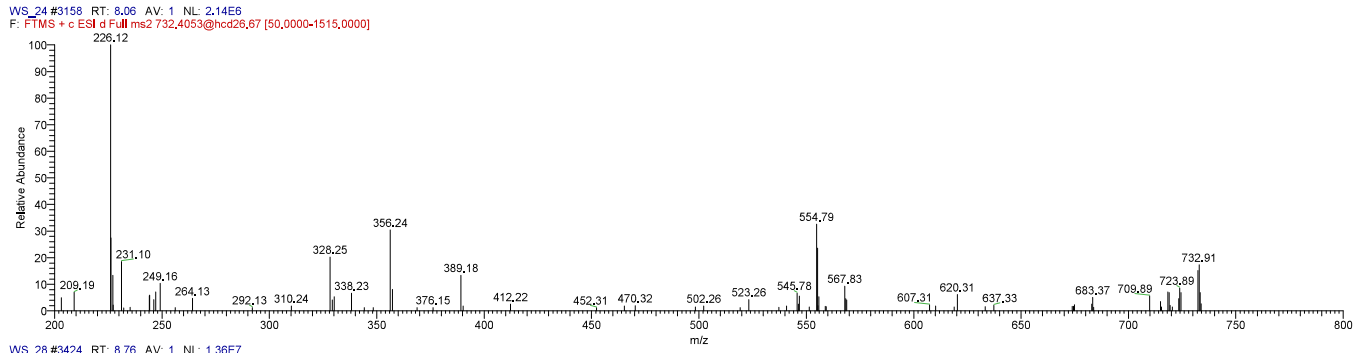

12

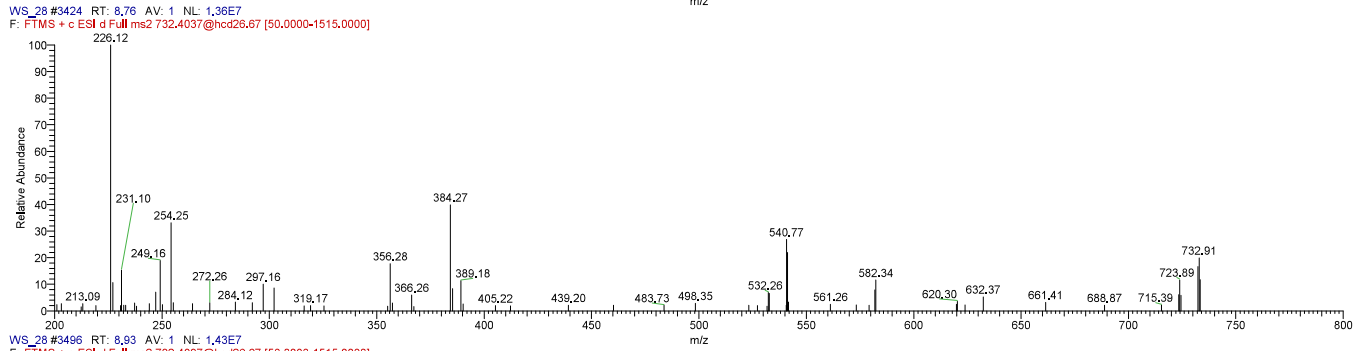

13

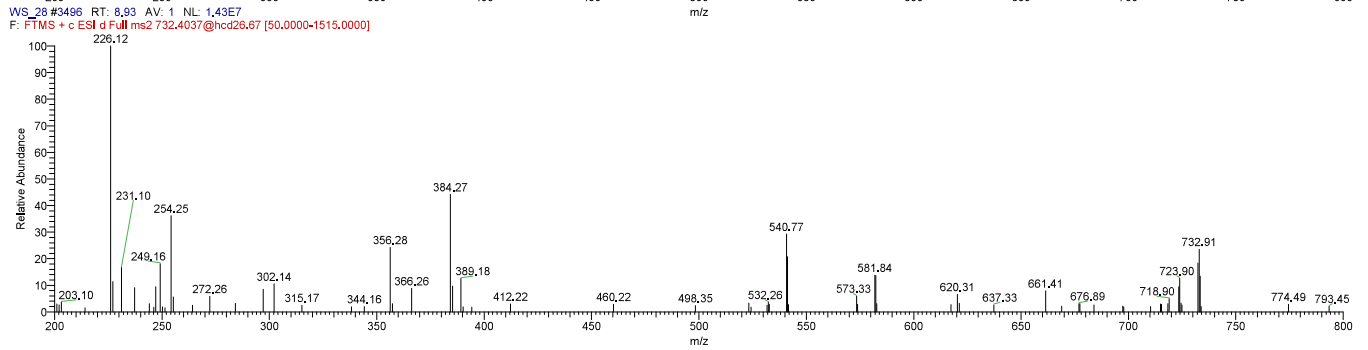

Figure S6 MS/MS spectra of compounds 8, 12 and 13

11

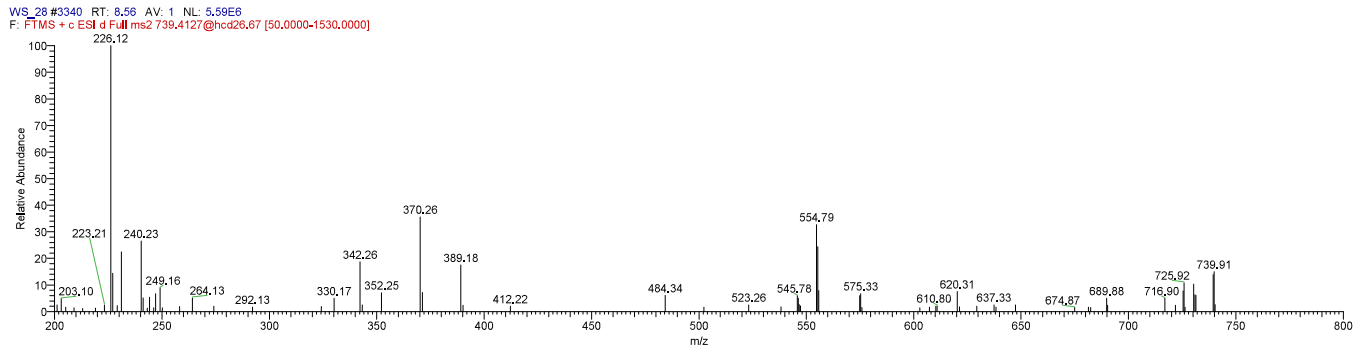

14

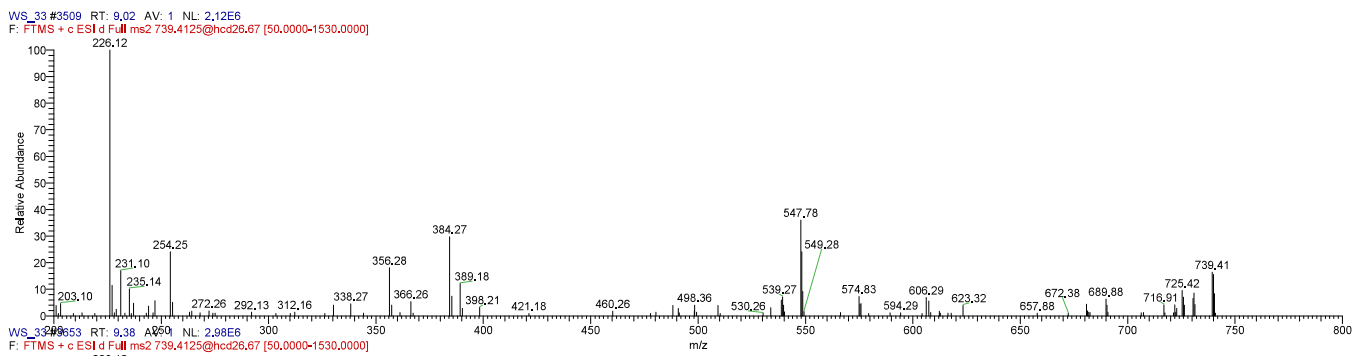

15

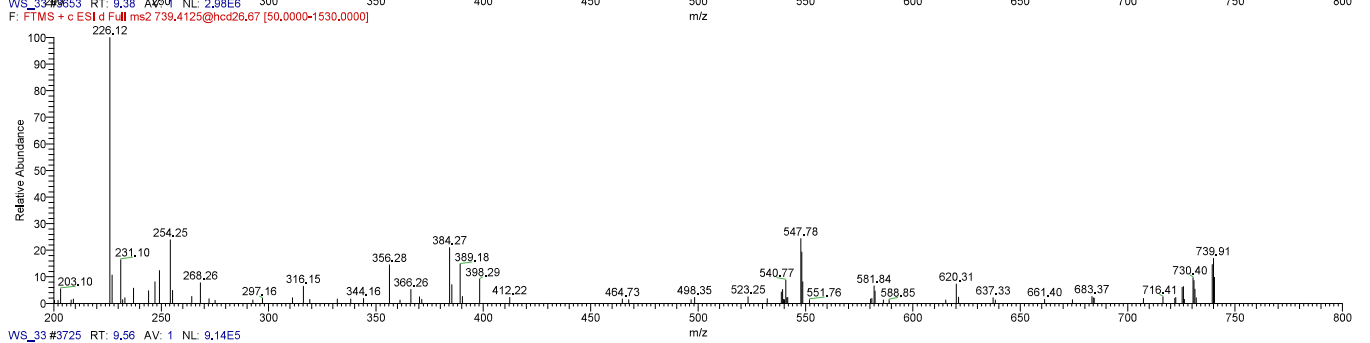

16

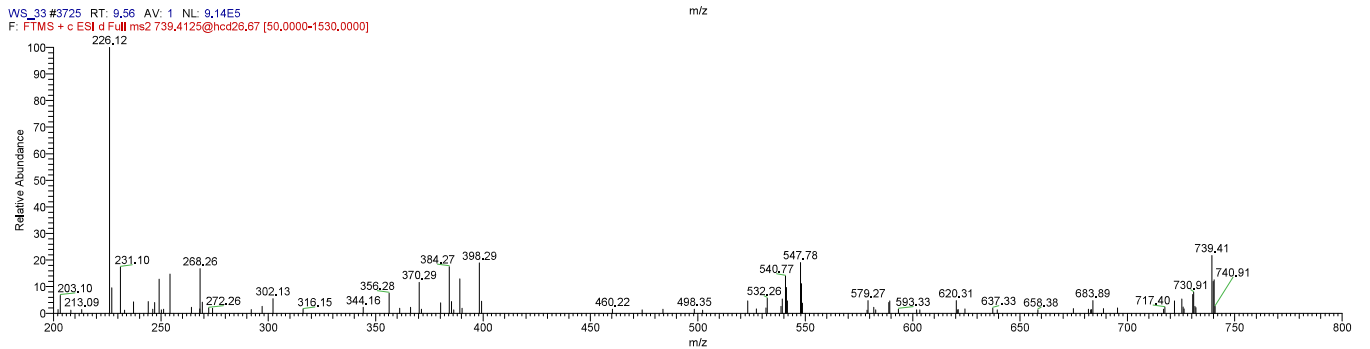

Figure S7 MS/MS spectra of compounds 11, 14, 15 and 16
